# Supplementary material for: N,N-Dimethylformamide assisted hydrothermal introduction of MoS2 on ultrathin g-C3N4 layers with enhanced visible light photocatalytic hydrogen evolution activity
Source: Royal Society of Chemistry journal article supplement (doi:10.1039/c9se00173e), 2019-01-01
Supplement: c9se00173e1.pdf [file c9se00173e1.pdf]

***N,N*-Dimethylformamide Assisted Hydrothermally Introducing MoS<sub>2</sub> on ultrathin g-C<sub>3</sub>N<sub>4</sub>  
layers with Enhanced Visible Light Photocatalytic Hydrogen Evolution Activity**

*Shiting Wu<sup>a</sup>, Xiaowei Shi<sup>b</sup>, Mingshan Zhu<sup>\*,c</sup>*

*<sup>a</sup> College of Materials & Environmental Engineering, Hangzhou Dianzi University, Hangzhou  
310018, P. R. China*

*<sup>b</sup> Department of Applied Chemistry, Zhejiang University of Technology, Hangzhou 310032, P. R.  
China*

*<sup>c</sup> School of Environment, Jinan University, Guangzhou, 510632, P.R. China*

**Supporting Information**

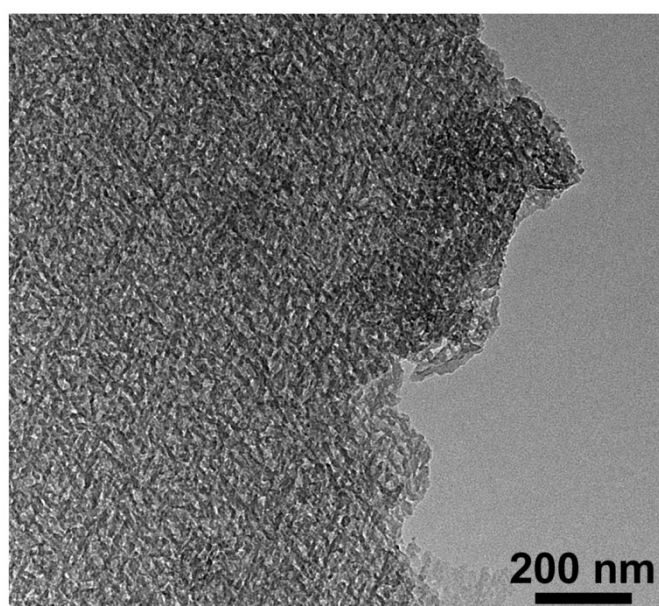

**Fig. S1** TEM image of g-C<sub>3</sub>N<sub>4</sub>.

---

\* Corresponding author: [zhumingshan@jnu.edu.cn](mailto:zhumingshan@jnu.edu.cn)

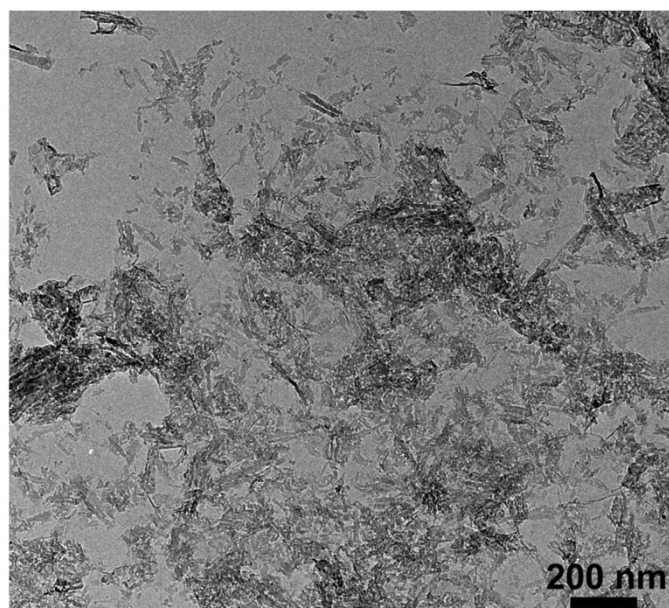

**Fig. S2** TEM image of g-C<sub>3</sub>N<sub>4</sub> after hydrothermal using water as solvent.

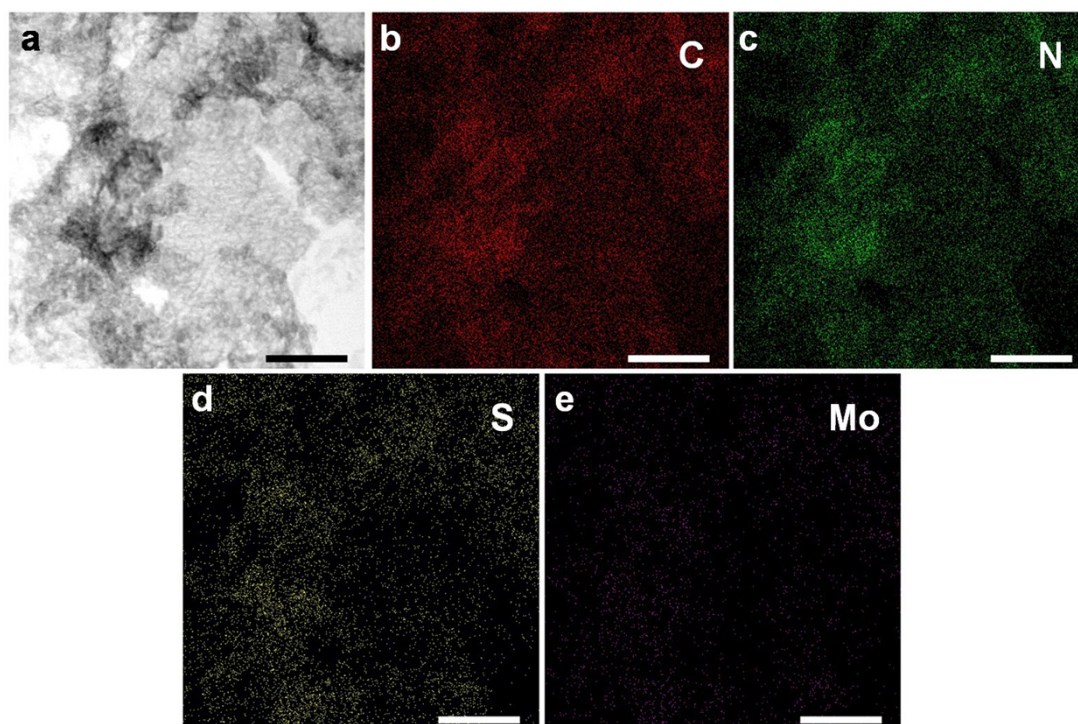

**Fig. S3** (a) TEM image and elemental mapping of (b) C, (c) N, (d) S, and (e) Mo of CM-2.5. The scale bar is 300 nm.

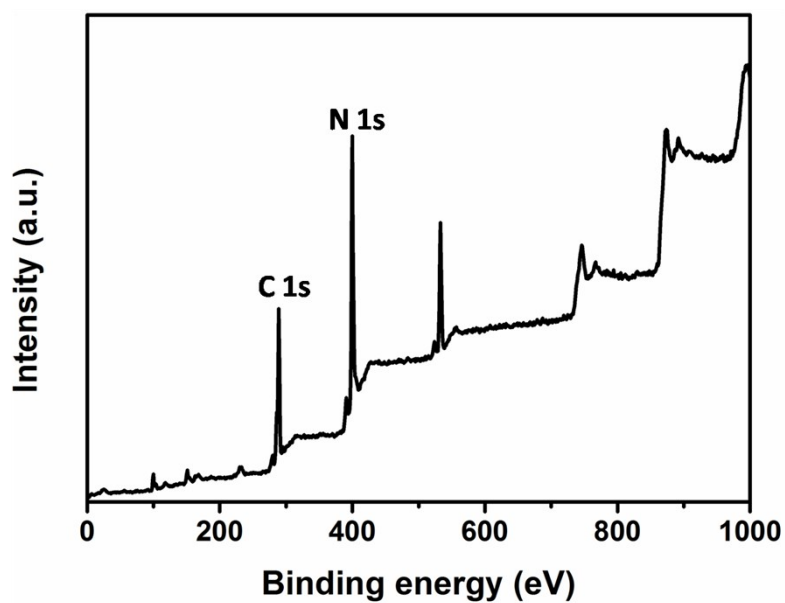

**Fig. S4** Wide-scan XPS spectrum of CM-2.5.

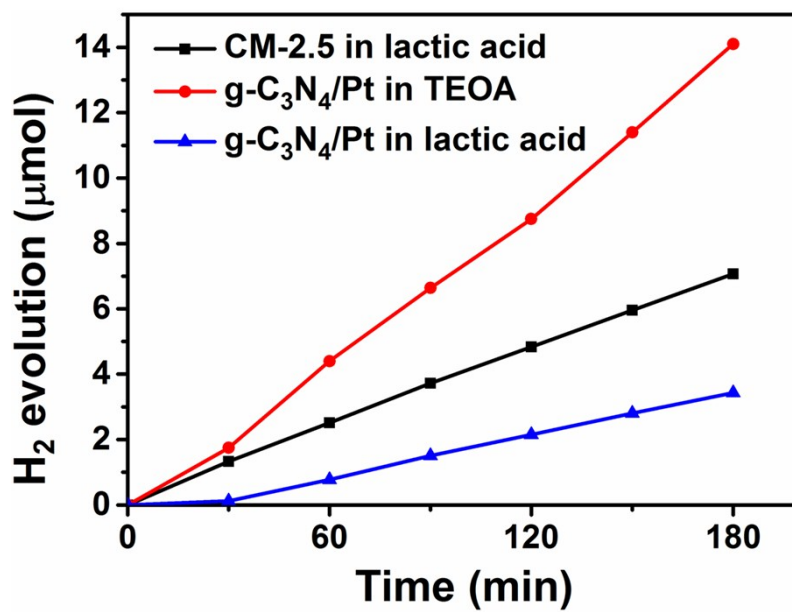

**Fig. S5** Comparison of photocatalytic H<sub>2</sub> evolution activities of CM-2.5 and g-C<sub>3</sub>N<sub>4</sub>/Pt in different sacrificial agents.

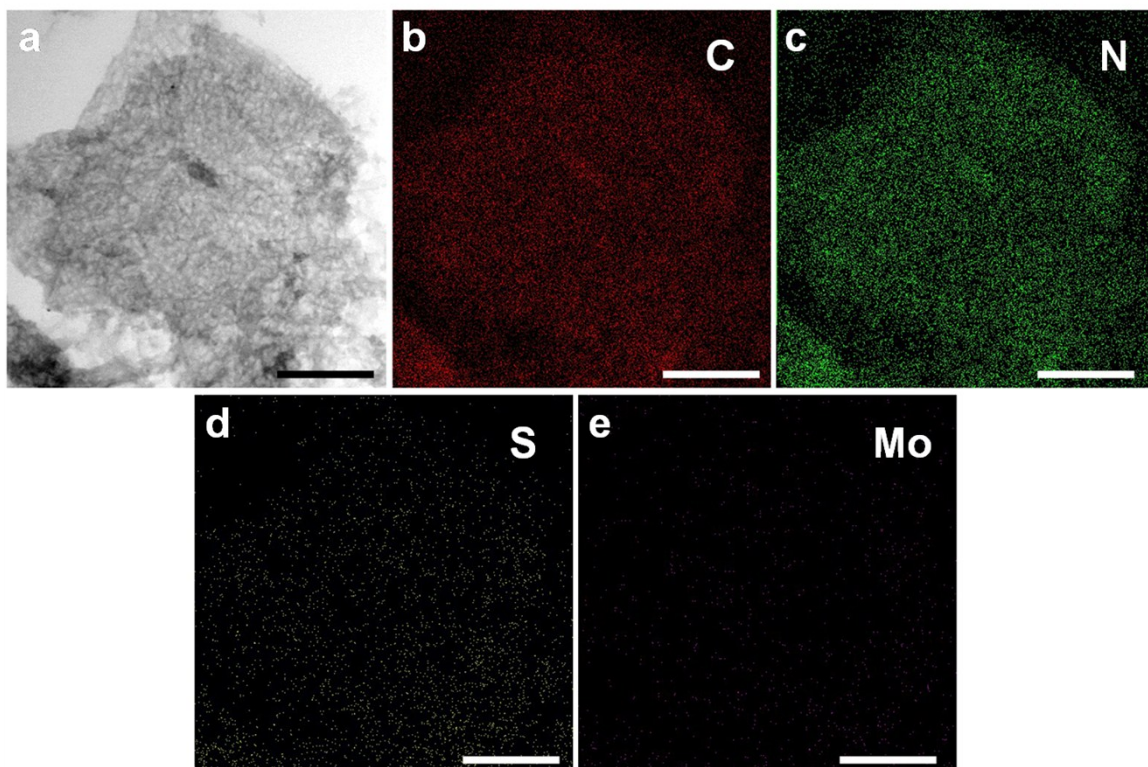

**Fig. S6** (a) TEM image and elemental mapping of (b) C, (c) N, (d) S, and (e) Mo of CM-2.5 after stability test. The scale bar is 250 nm.

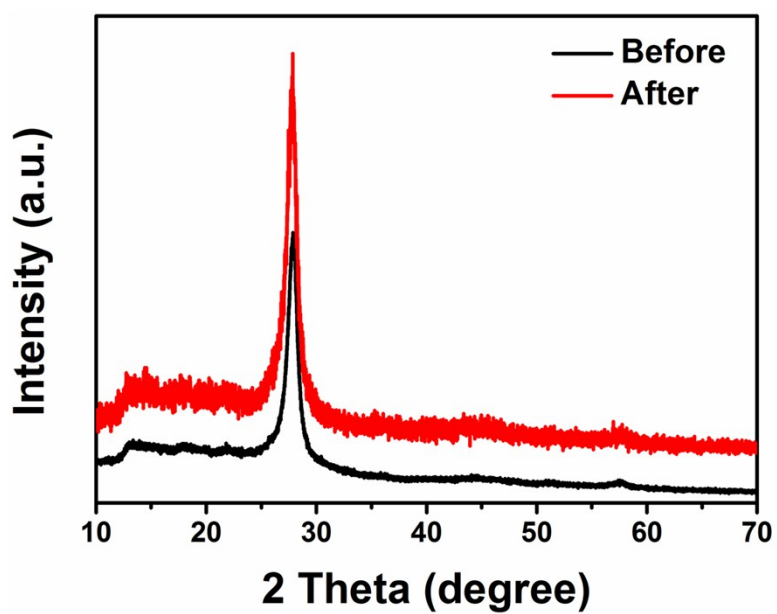

**Fig. S7** XRD pattern of CM-2.5 before and after stability test.

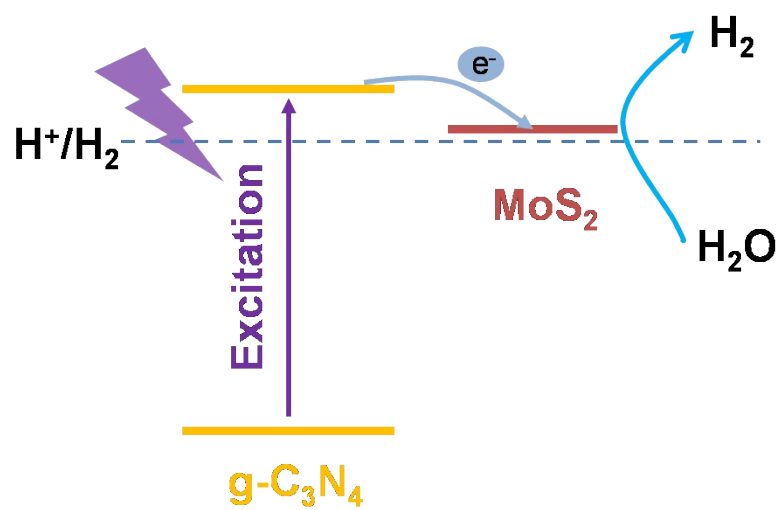

**Fig. S8** Photocatalytic  $\text{H}_2$  evolution schematic diagram of CM-X.
